# Supplementary material for: CRISPR DNA elements controlling site-specific spacer integration and proper repeat length by a Type II CRISPR–Cas system
Source: PubMed Central journal article supplement (PMC6895254; doi:10.1093/nar/gkz677), 2019-08-08
Supplement: gkz677_supplemental_file.pdf [file gkz677_supplemental_file.pdf]

**Supplementary Material for**

**CRISPR DNA elements controlling site-specific spacer integration and proper repeat length by a Type II CRISPR-Cas system**

Jenny G. Kim, Sandra Garrett, Yunzhou Wei, Brenton R. Graveley and Michael P. Terns

### Supplementary Table S1. Plasmids used in this study.

| Plasmid name                | Plasmid description                                          |
|-----------------------------|--------------------------------------------------------------|
| pControl                    | pWAR derived from pWAR228 lacking CRISPR sequence            |
| pCRISPR                     | pWAR derived from pWAR228 with minimal CRISPR array<br>LRSRS |
| L1                          | pCRISPR leader mutation; nucleotides 21 - 32                 |
| L2                          | pCRISPR leader mutation; nucleotides 11 - 20                 |
| L3                          | pCRISPR leader mutation; nucleotides 1 - 10                  |
| pCas1/Cas2/Csn2/Cas9+CRISPR | pCas1/Cas2/Csn2/Cas9+minimal CRISPR array                    |
| Ins C24                     | pCas1/Cas2/Csn2/Cas9+CRISPR; insert C, +24                   |
| Del A23                     | pCas1/Cas2/Csn2/Cas9+CRISPR; delete A, +23                   |
| Ins C33                     | pCas1/Cas2/Csn2/Cas9+CRISPR; insert C, +33                   |
| Ins CG 33-34                | pCas1/Cas2/Csn2/Cas9+CRISPR; insert CG, +33-34               |
| Del C33                     | pCas1/Cas2/Csn2/Cas9+CRISPR; delete C, +33                   |
| Del CA 33-34                | pCas1/Cas2/Csn2/Cas9+CRISPR; delete CA, +33-34               |

## Supplementary Table S2. Oligonucleotides used in this study.

| Oligos   | Sequence (5' – 3')                                                                    |
|----------|---------------------------------------------------------------------------------------|
| S4-OS5-F | TCGTTACTGGTGAACCAGTTTCAAT                                                             |
| S4-OS5-R | AACTGGTTCACCAGTAACGACTGAG                                                             |
| WT-F     | TTCATTTGAGGTTTTTGTACTCTCAAGATTTAAGTAACTGTACAACCTGTTTGACAGCAAATCAAGA                   |
| WT-R     | TCTTGATTTGCTGTCAAACAGTTGTACAGTTACTTAAATCTTGAGAGTACAAAAACCTCAAATGAA                    |
| B1-F     | TTCAT <u>GGTCTTGGGG</u> TGTACTCTCAAGATTTAAGTAACTGTACAACCTGTTTGACAGCAAATCAAGA          |
| B1-R     | TCTTGATTTGCTGTCAAACAGTTGTACAGTTACTTAAATCTTGAGAGTAC <u>CCCCAAGACC</u> ATGAA            |
| B2-F     | TTCATTTGAGT <u>TGGGGGTGCA</u> TCTCAAGATTTAAGTAACTGTACAACCTGTTTGACAGCAAATCAAGA         |
| B2-R     | TCTTGATTTGCTGTCAAACAGTTGTACAGTTACTTAAATCTTGAGAT <u>TGCACCCCA</u> CTCAAATGAA           |
| B3-F     | TTCATTTGAGGTTTTTGTAC <u>GAGACCTC</u> TTTAAAGTAACTGTACAACCTGTTTGACAGCAAATCAAGA         |
| B3-R     | TCTTGATTTGCTGTCAAACAGTTGTACAGTTACTTAAAG <u>GAGGTCTC</u> GTACAAAAACCTCAAATGAA          |
| B4-F     | TTCATTTGAGGTTTTTGTACTCTCAAGAG <u>GGCCCTGC</u> ACTGTACAACCTGTTTGACAGCAAATCAAGA         |
| B4-R     | TCTTGATTTGCTGTCAAACAGTTGTACAGT <u>GCAGGCC</u> CTTGAGAGTACAAAAACCTCAAATGAA             |
| B5-F     | TTCATTTGAGGTTTTTGTACTCTCAAGATTTAAGT <u>CAGTGCACCA</u> TGTTTGACAGCAAATCAAGA            |
| B5-R     | TCTTGATTTGCTGTCAAACA <u>TGGTGCACTG</u> TACTTAAATCTTGAGAGTACAAAAACCTCAAATGAA           |
| IR 1-F   | TTCATTTGAGGTTT <u>AACATG</u> TCTCAAGATTTAAGTAACTGTACAACCTGTTTGACAGCAAATCAAGA          |
| IR 1-R   | TCTTGATTTGCTGTCAAACAGTTGTACAGTTACTTAAATCTTGAGAT <u>CATGTT</u> AAACCTCAAATGAA          |
| IR 2-F   | TTCATTTGAGGTTTTTGTACTCTCAAGATTTAAGTAACT <u>CATGTT</u> CTGTTTGACAGCAAATCAAGA           |
| IR 2-R   | TCTTGATTTGCTGTCAAACAG <u>AACATG</u> AGTTACTTAAATCTTGAGAGTACAAAAACCTCAAATGAA           |
| IR 3-F   | TTCATTTGAGGTTT <u>AACATG</u> TCTCAAGATTTAAGTAACT <u>CATGTT</u> CTGTTTGACAGCAAATCAAGA  |
| IR 3-R   | TCTTGATTTGCTGTCAAACAG <u>AACATG</u> AGTTACTTAAATCTTGAGAT <u>CATGTT</u> AAACCTCAAATGAA |
| G1C-F    | TTCATTTGAG <u>C</u> TTTTTGTACTCTCAAGATTTAAGTAACTGTACAACCTGTTTGACAGCAAATCAAGA          |
| G1C-R    | TCTTGATTTGCTGTCAAACAGTTGTACAGTTACTTAAATCTTGAGAGTACAAAA <u>G</u> CTCAAATGAA            |
| G1A-F    | TTCATTTGAG <u>A</u> TTTTTGTACTCTCAAGATTTAAGTAACTGTACAACCTGTTTGACAGCAAATCAAGA          |
| G1A-R    | TCTTGATTTGCTGTCAAACAGTTGTACAGTTACTTAAATCTTGAGAGTACAAAA <u>T</u> CTCAAATGAA            |
| G1T-F    | TTCATTTGAG <u>T</u> TTTTTGTACTCTCAAGATTTAAGTAACTGTACAACCTGTTTGACAGCAAATCAAGA          |
| G1T-R    | TCTTGATTTGCTGTCAAACAGTTGTACAGTTACTTAAATCTTGAGAGTACAAAA <u>A</u> CTCAAATGAA            |
| G36C-F   | TTCATTTGAGGTTTTTGTACTCTCAAGATTTAAGTAACTGTACA <u>G</u> TGTTTGACAGCAAATCAAGA            |
| G36C-R   | TCTTGATTTGCTGTCAAACA <u>C</u> TTGTACAGTTACTTAAATCTTGAGAGTACAAAAACCTCAAATGAA           |
| G36A-F   | TTCATTTGAGGTTTTTGTACTCTCAAGATTTAAGTAACTGTACA <u>A</u> TGTTTGACAGCAAATCAAGA            |
| G36A-R   | TCTTGATTTGCTGTCAAACA <u>A</u> TTGTACAGTTACTTAAATCTTGAGAGTACAAAAACCTCAAATGAA           |
| G36T-F   | TTCATTTGAGGTTTTTGTACTCTCAAGATTTAAGTAACTGTACA <u>A</u> TGTTTGACAGCAAATCAAGA            |
| G36T-R   | TCTTGATTTGCTGTCAAACA <u>T</u> TTGTACAGTTACTTAAATCTTGAGAGTACAAAAACCTCAAATGAA           |
| C5-F     | TTCATTTGAGGTTT <u>C</u> TTGTACTCTCAAGATTTAAGTAACTGTACAACCTGTTTGACAGCAAATCAAGA         |
| C5-R     | TCTTGATTTGCTGTCAAACAGTTGTACAGTTACTTAAATCTTGAGAGTACA <u>G</u> AAACCTCAAATGAA           |
| C9-F     | TTCATTTGAGGTTTTTGT <u>C</u> ACTCTCAAGATTTAAGTAACTGTACAACCTGTTTGACAGCAAATCAAGA         |
| C9-R     | TCTTGATTTGCTGTCAAACAGTTGTACAGTTACTTAAATCTTGAGAGT <u>G</u> ACAAAAACCTCAAATGAA          |
| C14-F    | TTCATTTGAGGTTTTTGTACTCT <u>C</u> CAAGATTTAAGTAACTGTACAACCTGTTTGACAGCAAATCAAGA         |
| C14-R    | TCTTGATTTGCTGTCAAACAGTTGTACAGTTACTTAAATCTTG <u>G</u> AGAGTACAAAAACCTCAAATGAA          |
| C19-F    | TTCATTTGAGGTTTTTGTACTCTCAAGATTTAAGTAACTGTACAACCTGTTTGACAGCAAATCAAGA                   |
| C19-R    | TCTTGATTTGCTGTCAAACAGTTGTACAGTTACTTAAAG <u>G</u> CTTGAGAGTACAAAAACCTCAAATGAA          |

C24-F TTCATTTGAGGTTTTTGTACTCTCAAGATTTACGTAACTGTACAACCTGTTTGACAGCAAATCAAGA  
 C24-R TCTTGATTTGCTGTCAAACAGTTGTACAGTTACGTAAATCTTGAGAGTACAAAAACCTCAAATGAA  
 C28-F TTCATTTGAGGTTTTTGTACTCTCAAGATTTAAGTAACCTGTACAACCTGTTTGACAGCAAATCAAGA  
 C28-R TCTTGATTTGCTGTCAAACAGTTGTACAGGTACTTAAATCTTGAGAGTACAAAAACCTCAAATGAA  
 C33-F TTCATTTGAGGTTTTTGTACTCTCAAGATTTAAGTAACTGTACCCAACTGTTTGACAGCAAATCAAGA  
 C33-R TCTTGATTTGCTGTCAAACAGTTGTACAGTTACTTAAATCTTGAGAGTACAAAAACCTCAAATGAA  
 C36-F TTCATTTGAGGTTTTTGTACTCTCAAGATTTAAGTAACTGTACAACCTGTTTGACAGCAAATCAAGA  
 C36-R TCTTGATTTGCTGTCAAACAGGTGTACAGTTACTTAAATCTTGAGAGTACAAAAACCTCAAATGAA  
 Ins36-F TTCATTTGAGGTTTTTGTACTCTCAAGATTTAAGTAACTGTACAAACTGTTTGACAGCAAATCAAGA  
 Ins36-R TCTTGATTTGCTGTCAAACAGTTTGTACAGTTACTTAAATCTTGAGAGTACAAAAACCTCAAATGAA  
 Ins36-37-F TTCATTTGAGGTTTTTGTACTCTCAAGATTTAAGTAACTGTACAAATCTGTTTGACAGCAAATCAAGA  
 Ins36-37-R TCTTGATTTGCTGTCAAACAGATTTGTACAGTTACTTAAATCTTGAGAGTACAAAAACCTCAAATGAA  
 Ins36-38-F TTCATTTGAGGTTTTTGTACTCTCAAGATTTAAGTAACTGTACAAATACTGTTTGACAGCAAATCAAGA  
 Ins36-38-R TCTTGATTTGCTGTCAAACAGTATTTGTACAGTTACTTAAATCTTGAGAGTACAAAAACCTCAAATGAA  
 Del35-F TTCATTTGAGGTTTTTGTACTCTCAAGATTTAAGTAACTGTACACTGTTTGACAGCAAATCAAGA  
 Del35-R TCTTGATTTGCTGTCAAACAGTGTACAGTTACTTAAATCTTGAGAGTACAAAAACCTCAAATGAA  
 Del34-35-F TTCATTTGAGGTTTTTGTACTCTCAAGATTTAAGTAACTGTACCTGTTTGACAGCAAATCAAGA  
 Del34-35-R TCTTGATTTGCTGTCAAACAGGTACAGTTACTTAAATCTTGAGAGTACAAAAACCTCAAATGAA  
 Del33-35-F TTCATTTGAGGTTTTTGTACTCTCAAGATTTAAGTAACTGTACTGTTTGACAGCAAATCAAGA  
 Del33-35-R TCTTGATTTGCTGTCAAACAGTACAGTTACTTAAATCTTGAGAGTACAAAAACCTCAAATGAA  
 Spacer- TTTTCATTTGAGGTTTTTGTACTCTCAAGATTTAAGTAACTGTACAACCTGTTTGACAGCAAATCAAGATT  
 Hairpin CGAATCGATAGATTCGAATCTTGATTTGCTGTCAAACAGTTGTACAGTTACTTAAATCTTGAGAGTACA  
 AAAACCTCAAATGAAA  
 Leader- AATCTTGATTTGCTGTCAAACAGTTGTACAGTTACTTAAATCTTGAGAGTACAAAAACCTCAAATGAAA  
 Hairpin TTTTGCGATAGCAAAATTCATTTGAGGTTTTTGTACTCTCAAGATTTAAGTAACTGTACAACCTGTTTG  
 ACAGCAAATCAAGATT

---

\*underlined annotates mutations

# Supplementary Figure S1

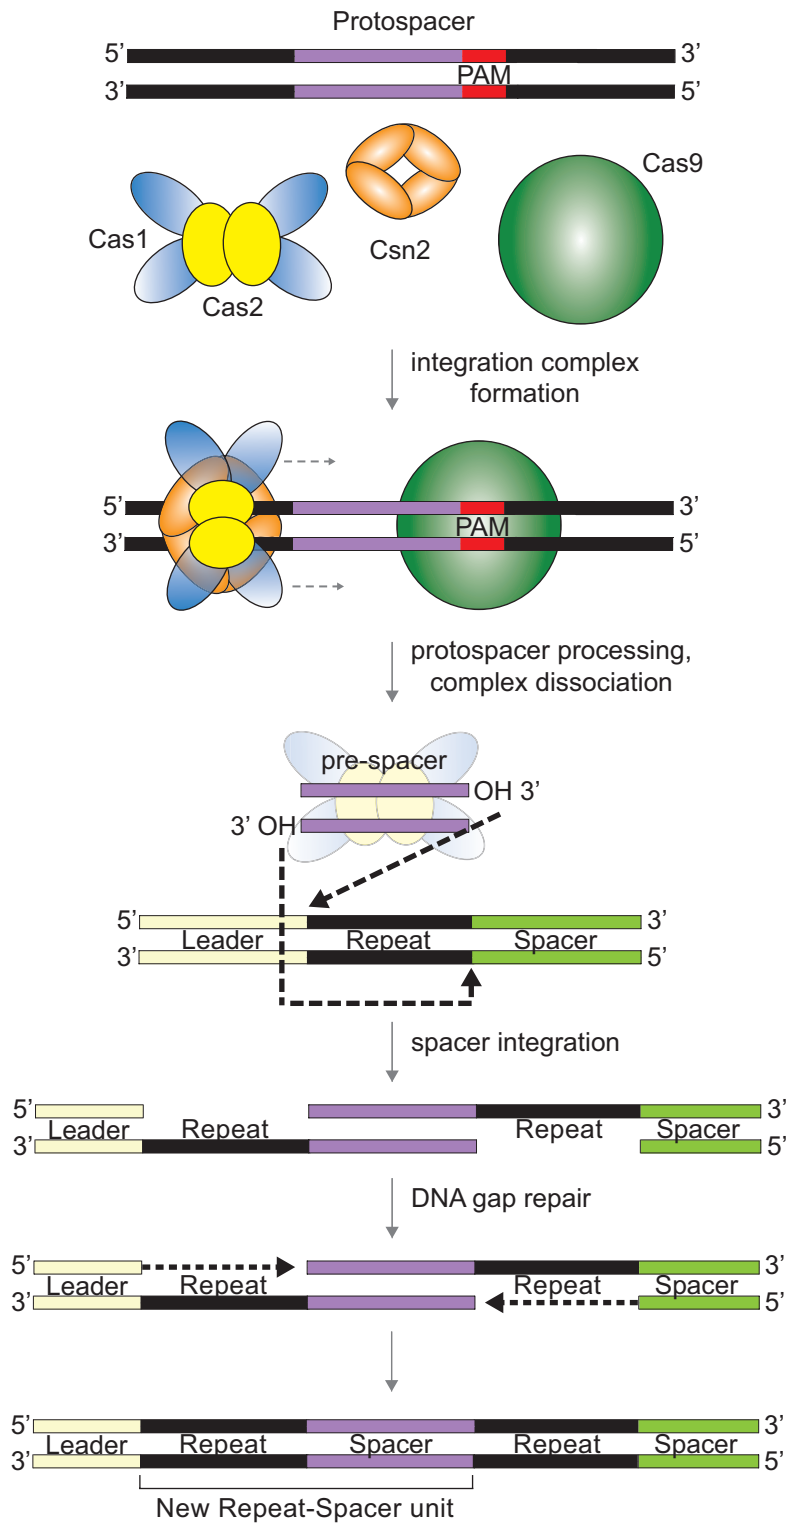

**Figure S1. Adaptation model for *S. thermophilus*.** CRISPR adaptation involves the capture of foreign invader sequences (protospacers) and generation of pre-spacers in a PAM-dependent manner by the adaptation proteins Cas1, Cas2, Csn2, Cas9 and/or other host factors. Site-directed incorporation of the sequences (pre-spacers) into the host CRISPR locus involves a two-step concerted transesterification reaction by Cas1 and Cas2 in which the 3'-OH groups of the pre-spacer DNA carries out nucleophilic attacks at the 5' ends of the repeat borders. DNA repair events fill in DNA gaps and ensure faithful duplication of a CRISPR repeat.

## Supplementary Figure S2

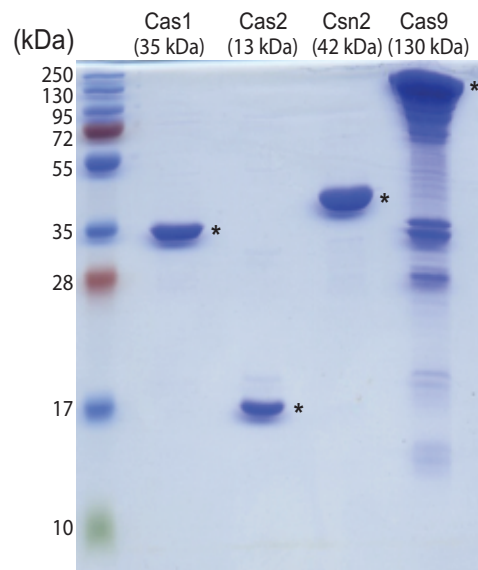

**Figure S2. Purified *S. thermophilus* Cas proteins.** Purification of individual Cas proteins by Ni<sup>2+</sup> affinity column chromatography. Products were separated by a SDS-PAGE gel followed by Coomassie blue staining. Bands corresponding to each protein are indicated by a black asterisk while molecular weights of the proteins are listed above.

**Supplementary Figure S3**

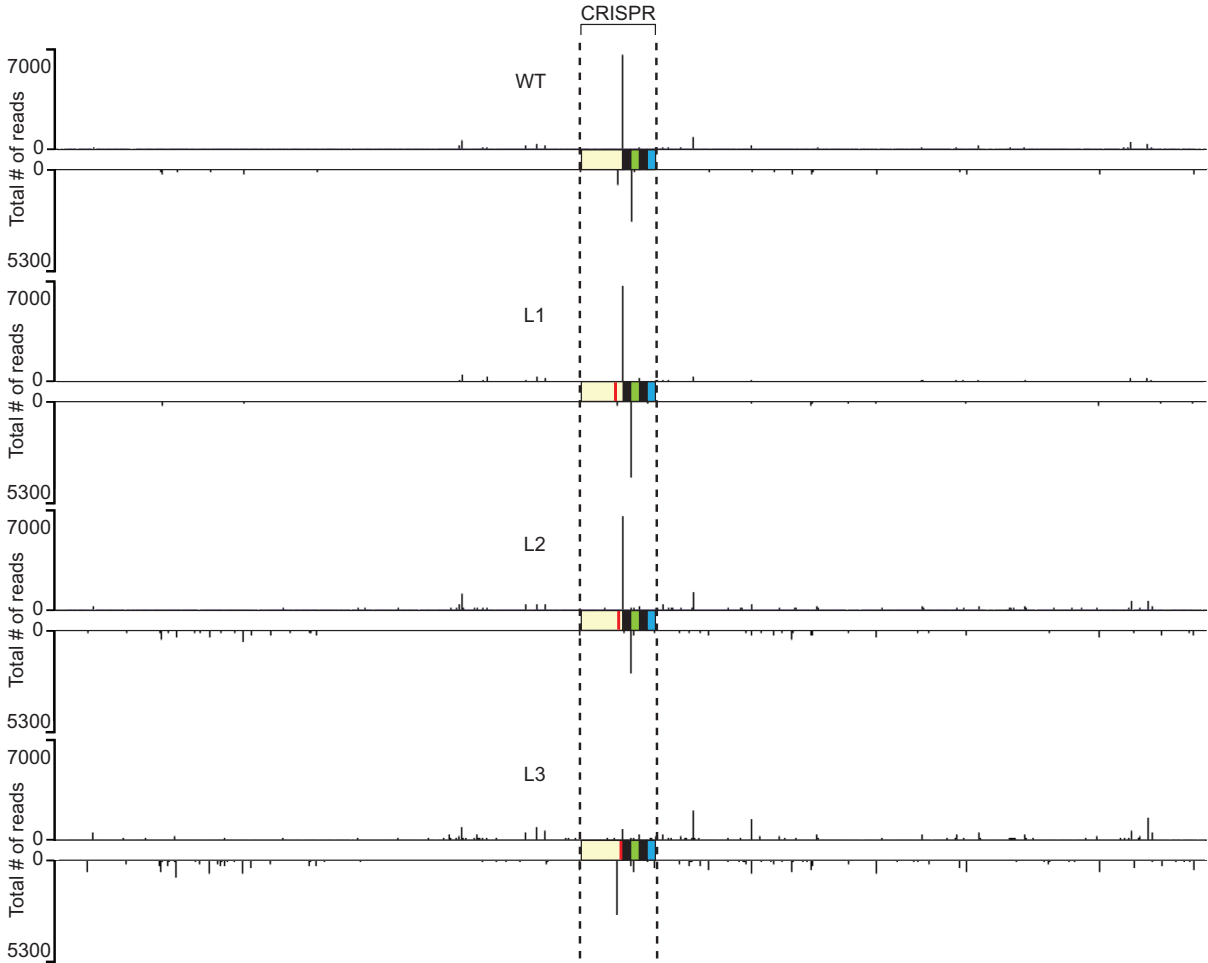

**Figure S3. Full plasmid mapping of integration sites on mutated pCRISPR.** High-throughput sequence mapping of integrated pre-spacers in mutated pCRISPR plasmids with mutated leader sequences (L1, L2, L3).



## Supplementary Figure S4

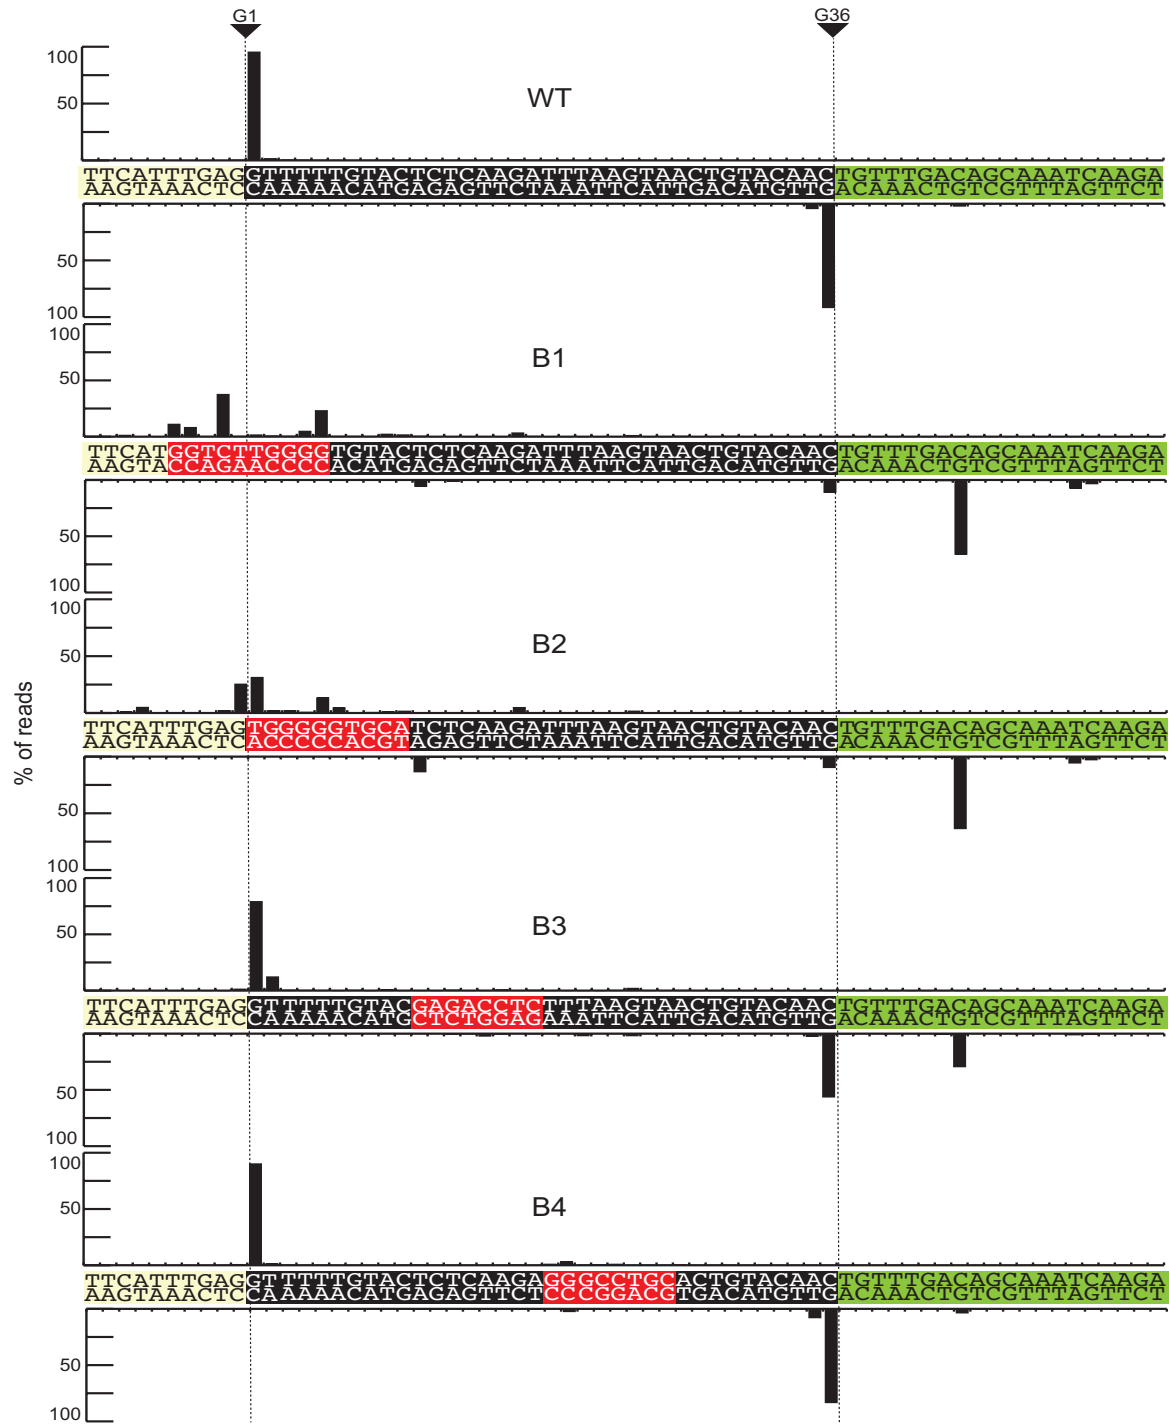

**Figure S4. Nucleotide resolution and detailed mapping of integration sites.** Histogram plots of high-throughput sequencing analysis of integrated pre-spacers in mutated linear CRISPR targets.

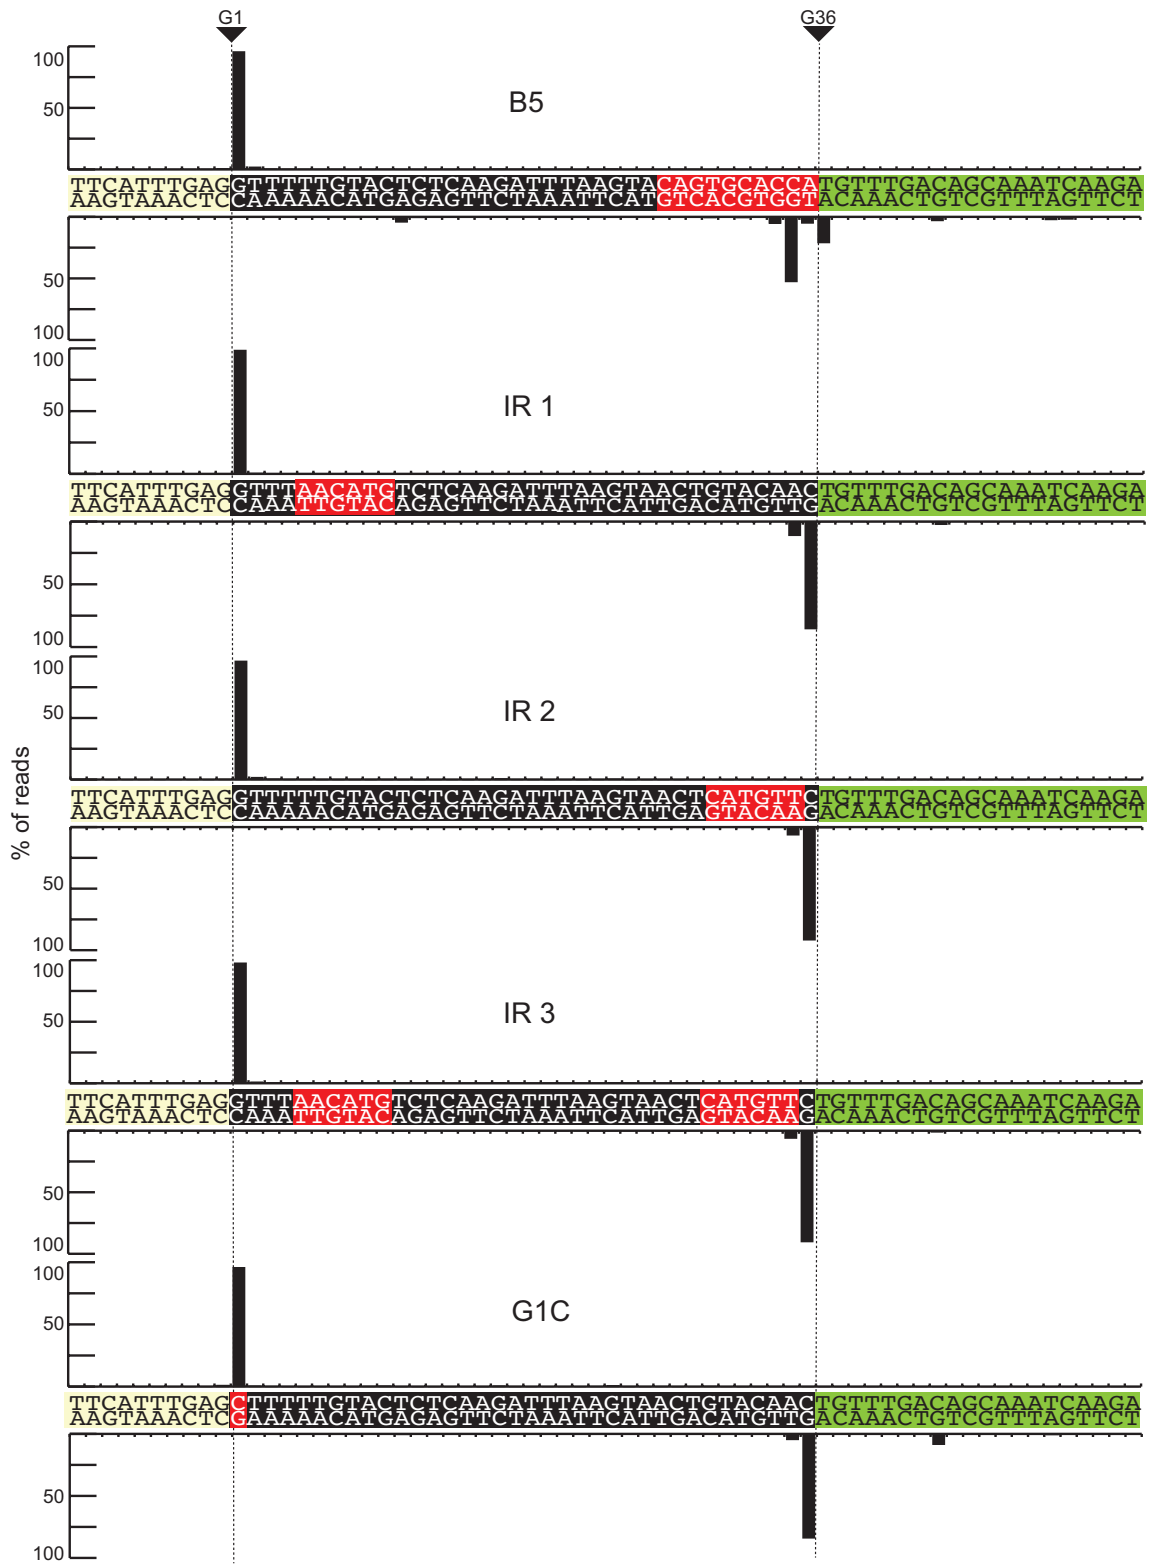

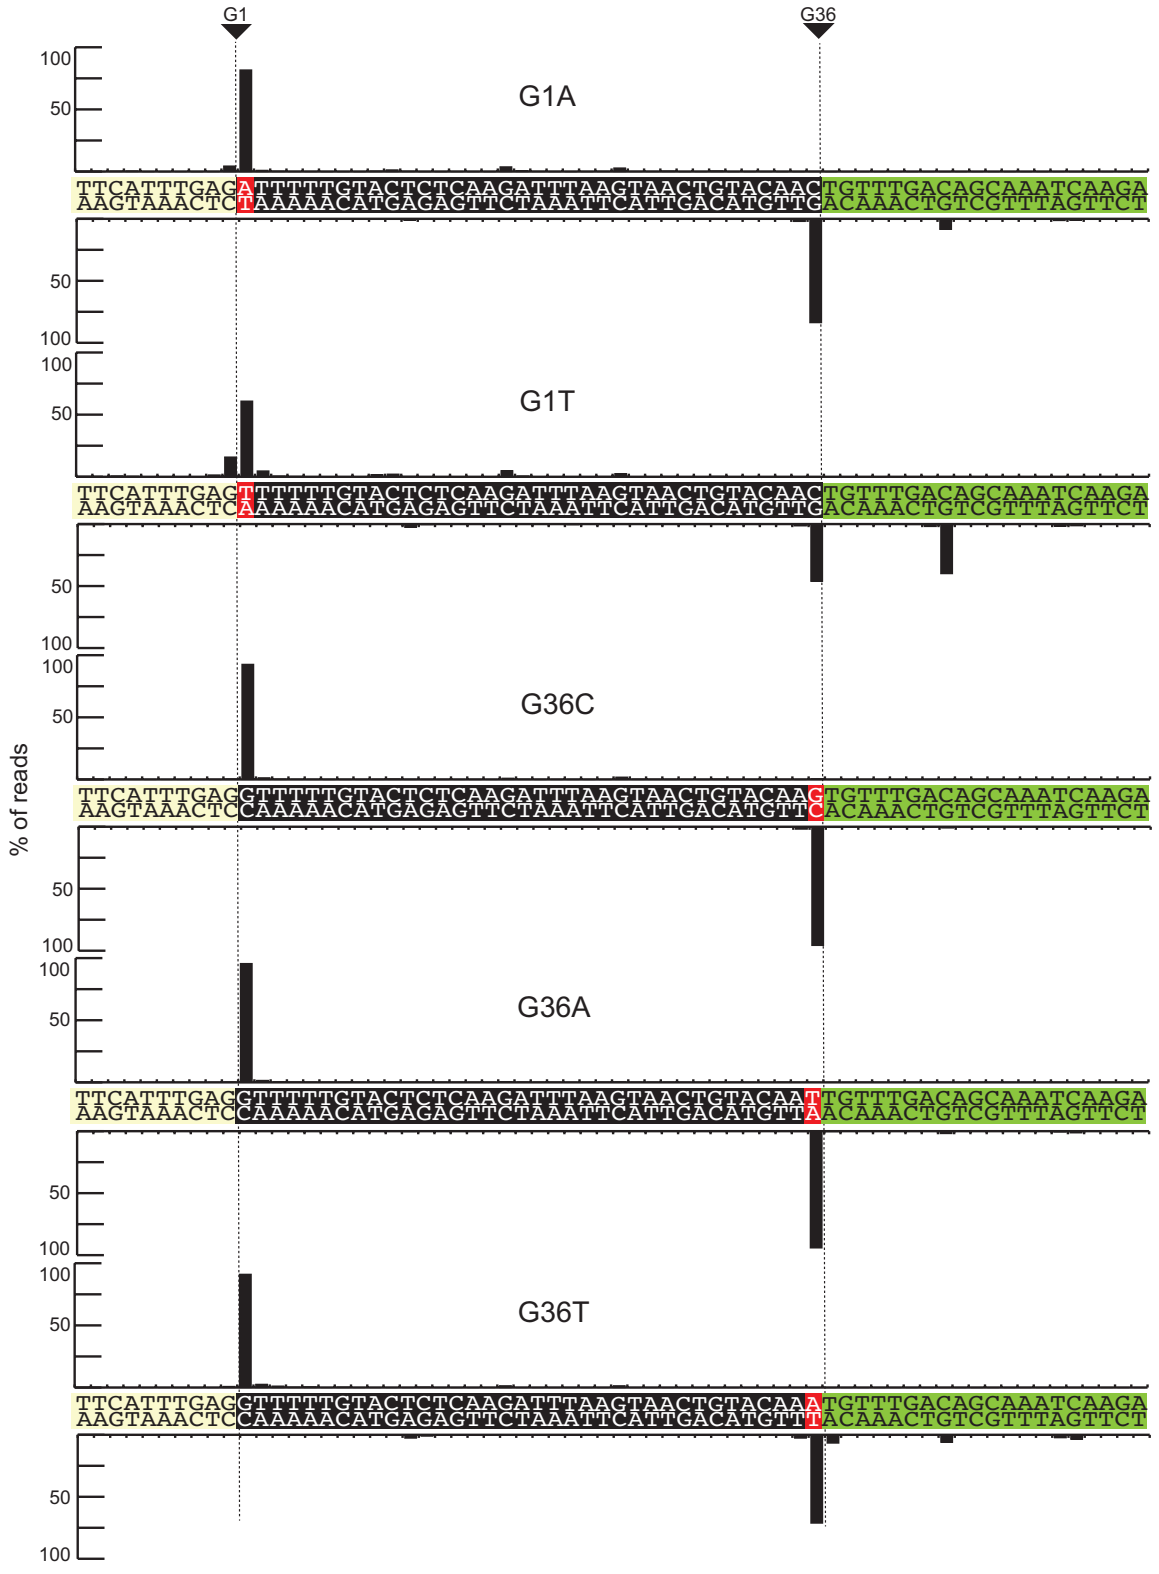

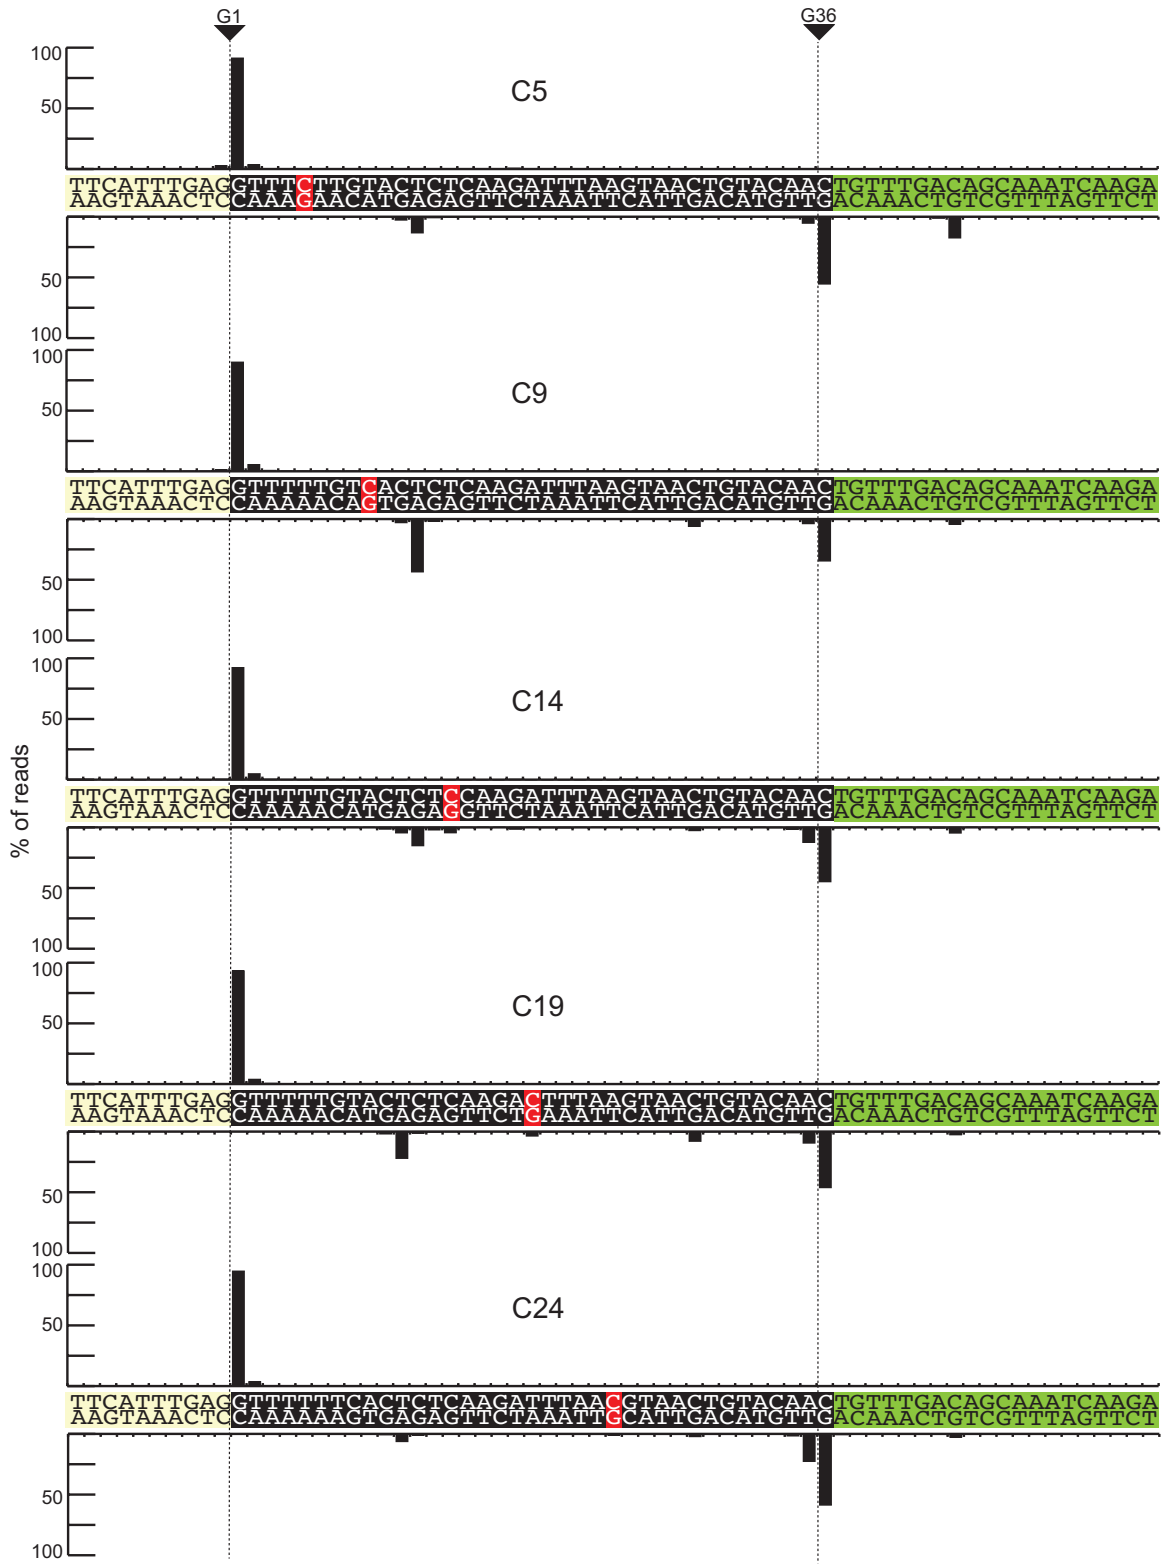

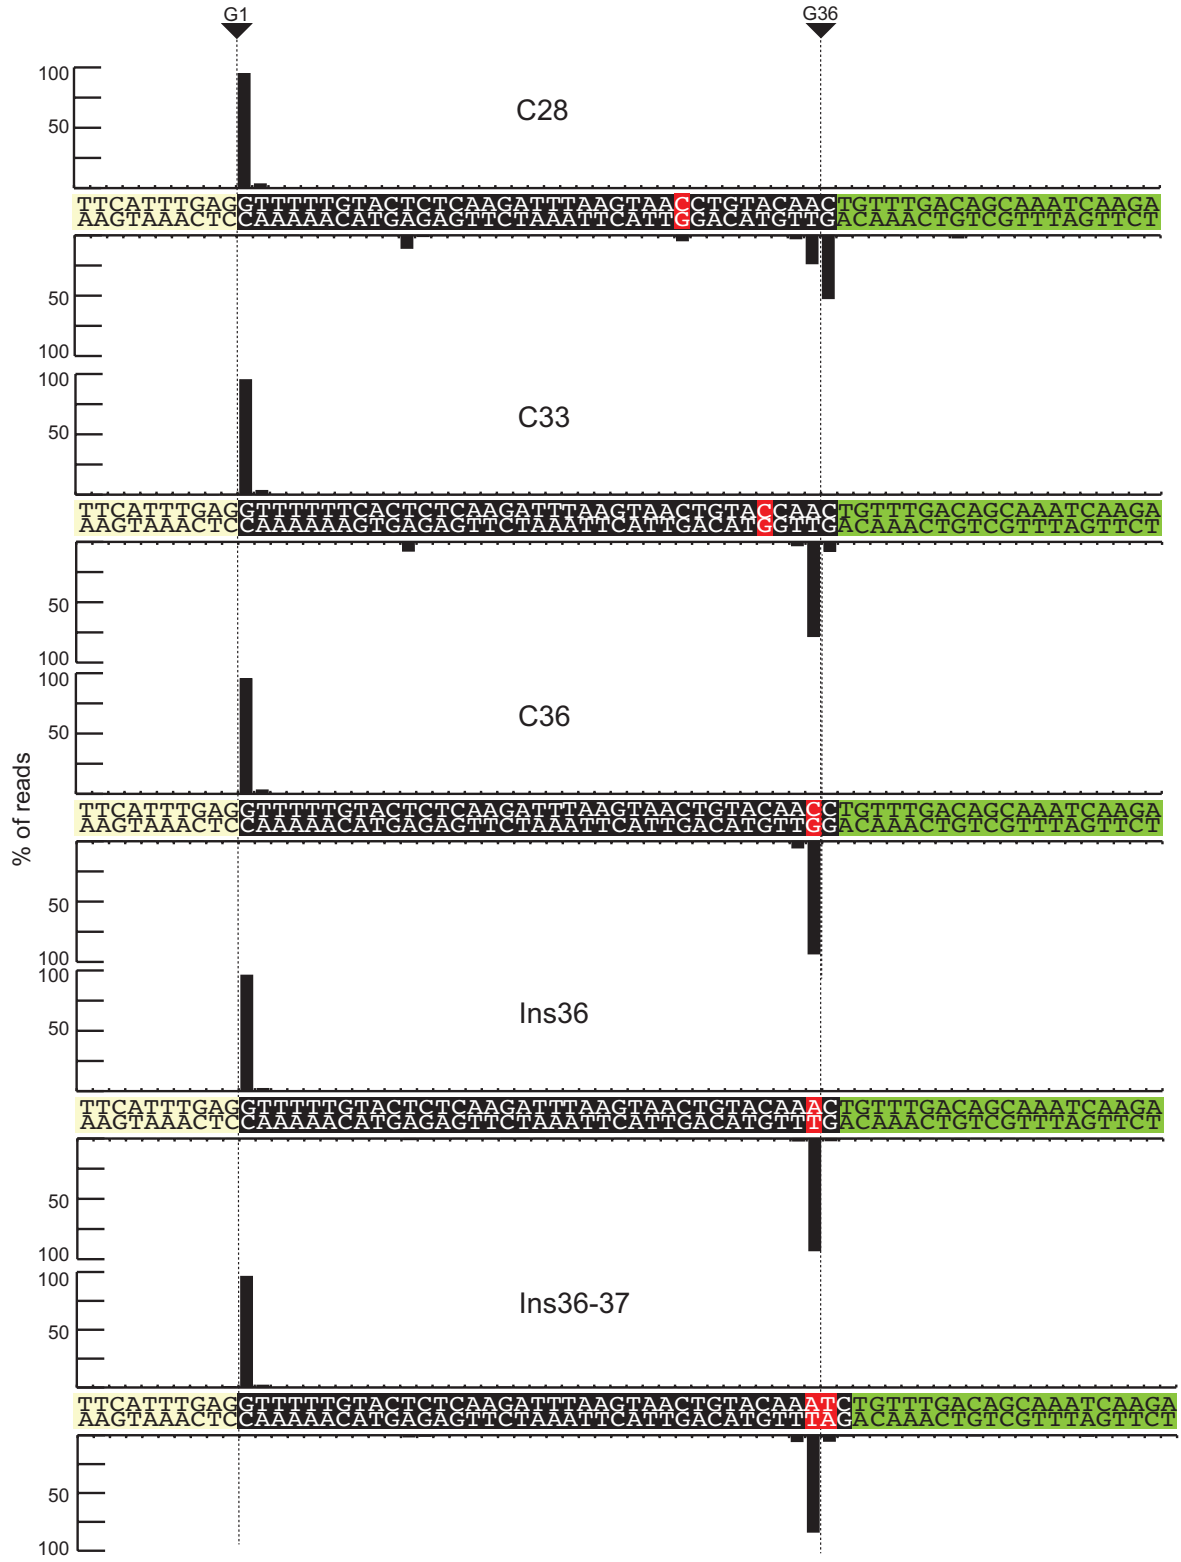

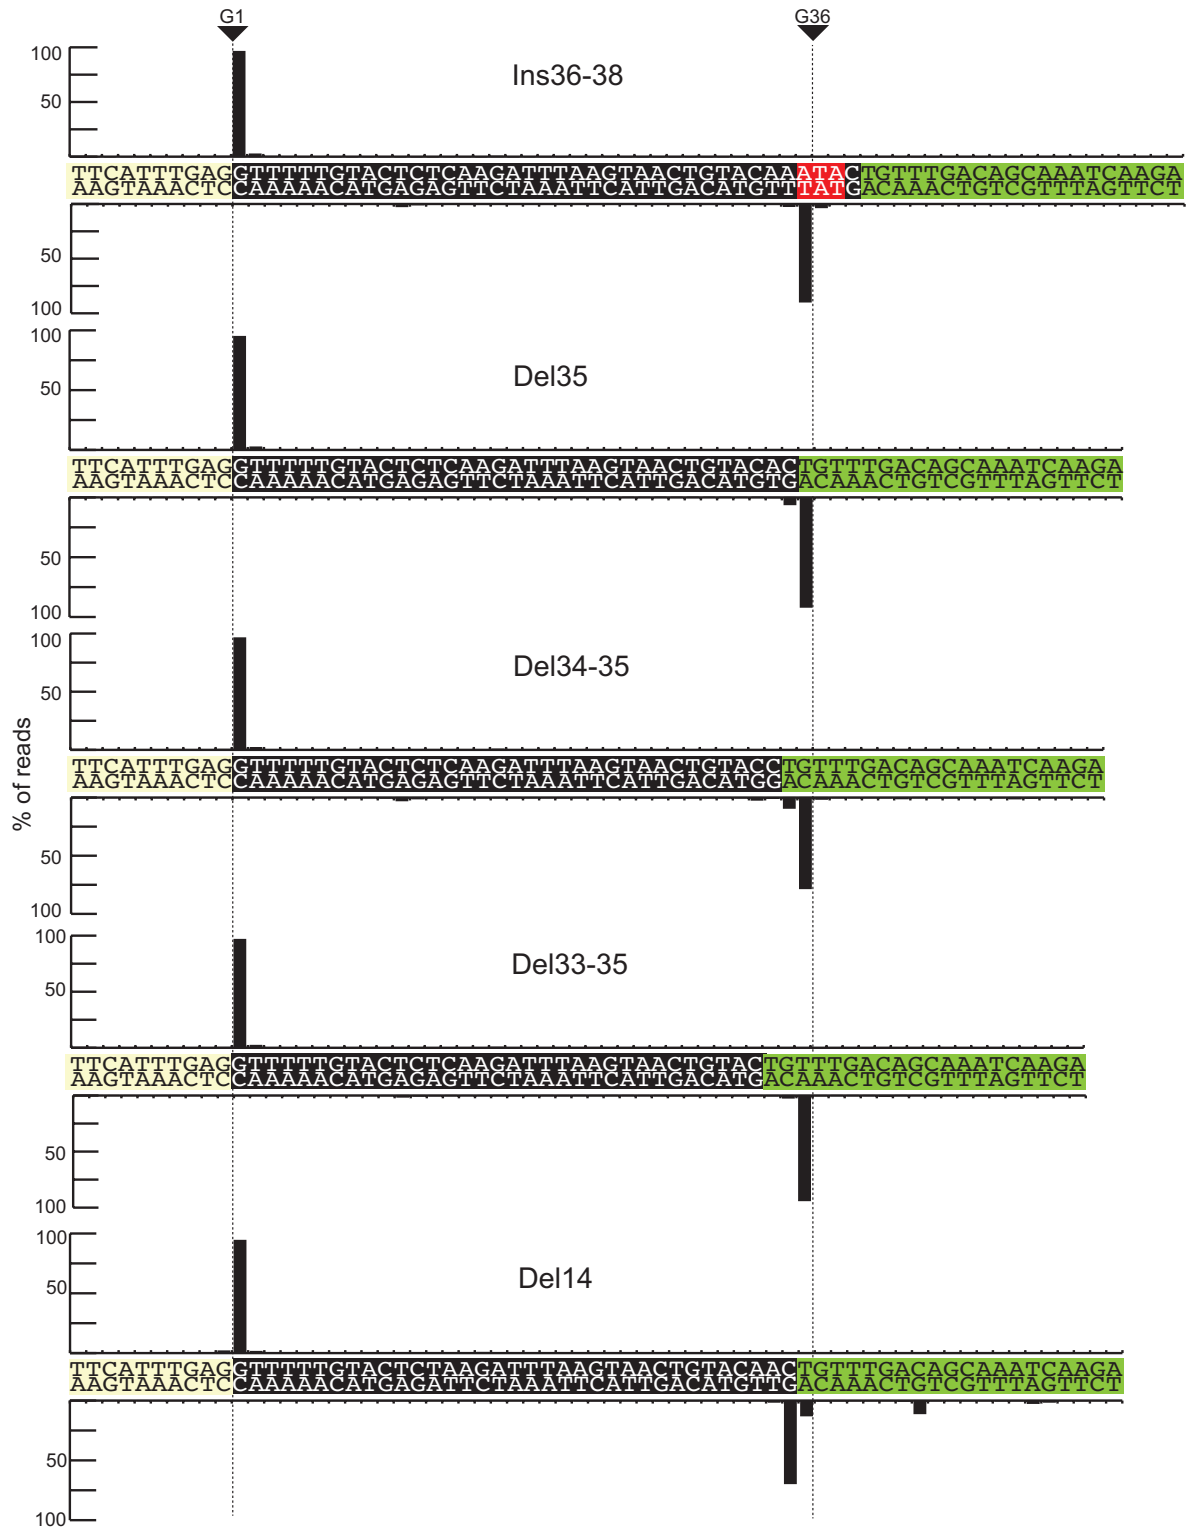

## Supplementary Figure S5

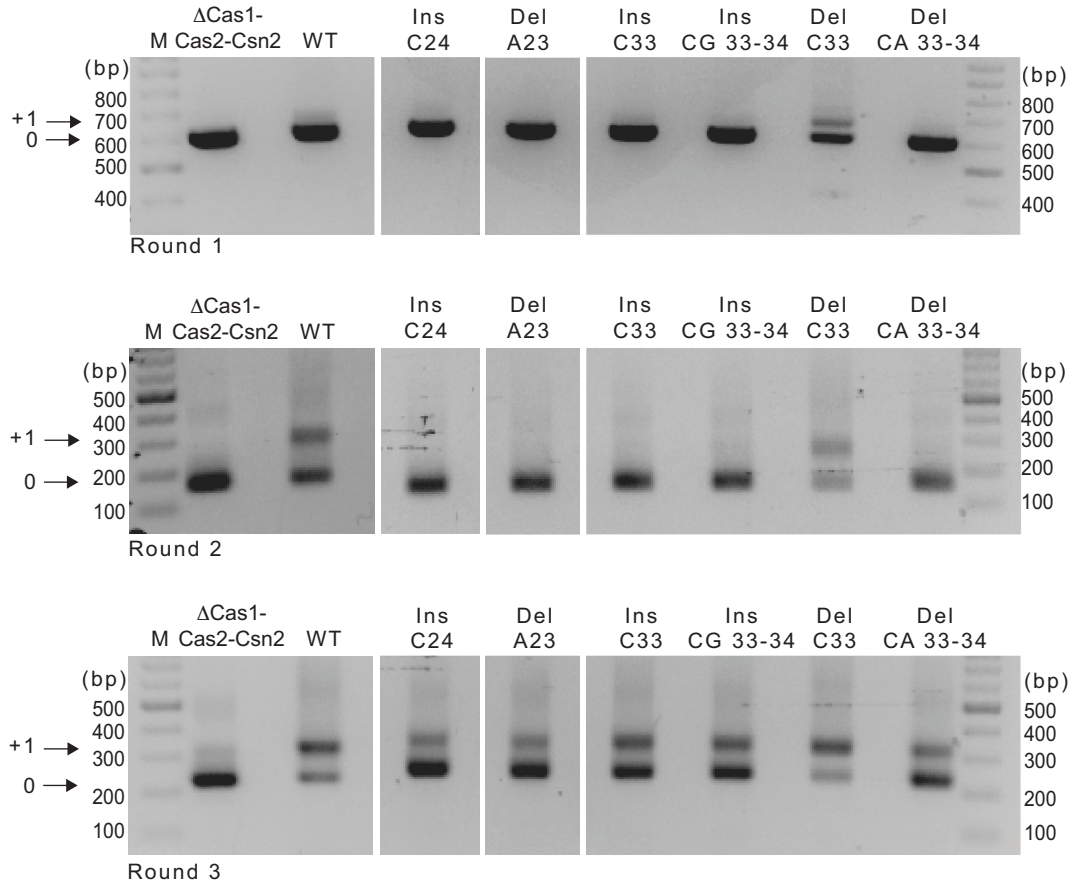

**Figure S5. Repeat sequence insertions and deletions reduce adaptation *in vivo*.** (Top panel) PCR amplification of the CRISPR array with either wildtype or indicated repeat sequence mutations. Regions in the agarose gel containing expanded CRISPR arrays (+1) were gel excised away from unexpanded CRISPR arrays (0). Extracted DNA was used as template for re-amplification of the array (middle and bottom panels). Adaptation null strain ( $\Delta$ Cas1-Cas2-Csn2) containing the pCRISPR plasmid served as a negative control.

# Supplementary Figure S6

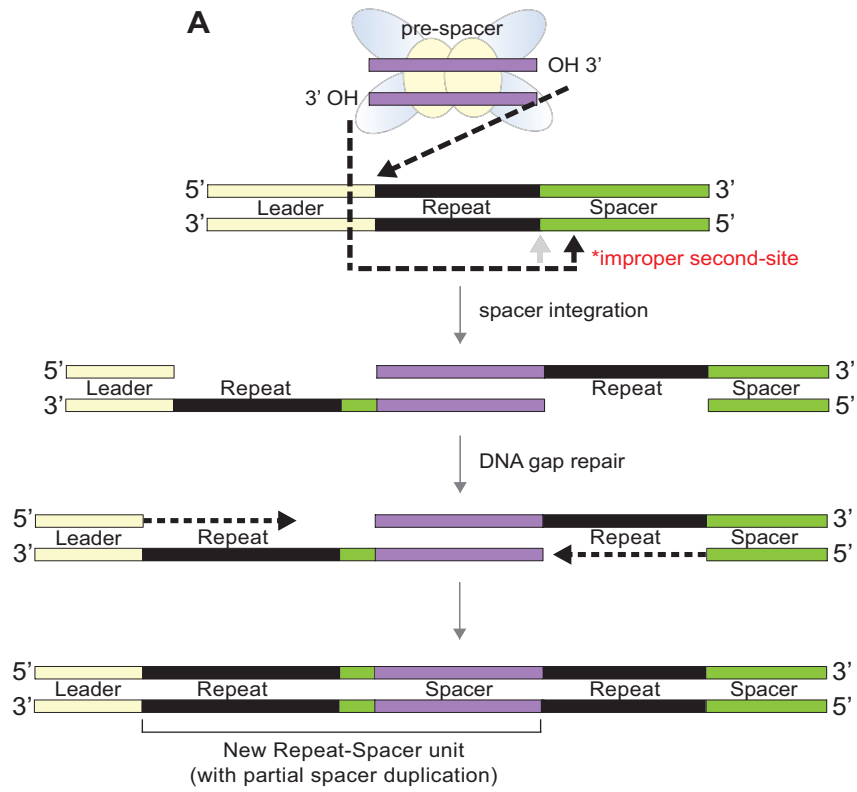

**B**

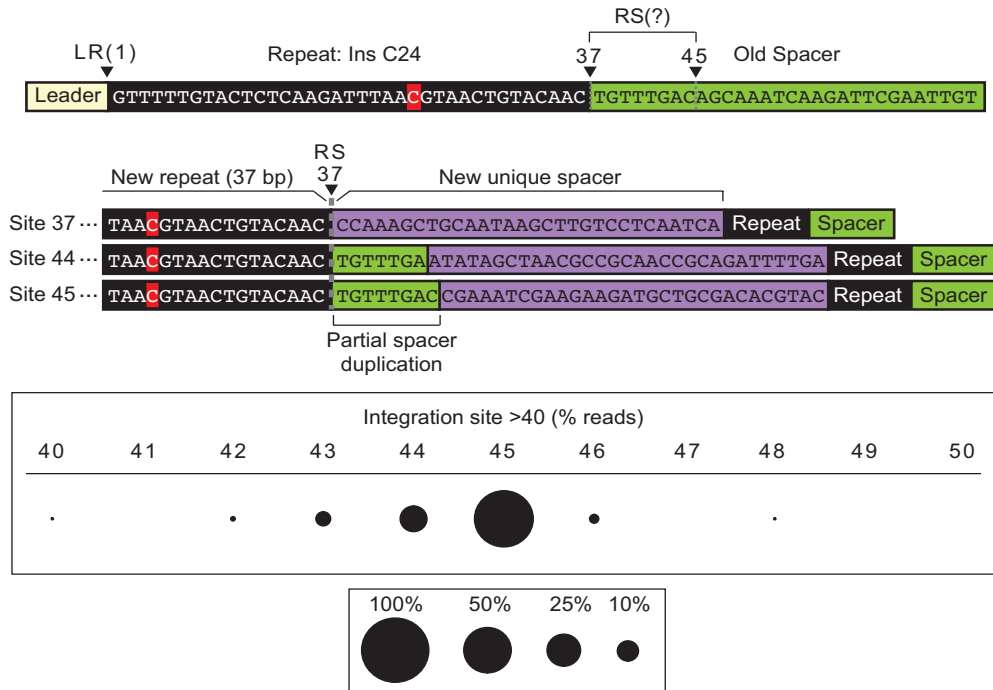



**Figure S6. Incorrect second-site integration of the repeat results in partial spacer duplication *in vivo*.** (A) Schematic of improper second-site recognition during pre-spacer integration. Misrecognition of the repeat-spacer junction and integration at sites downstream in the adjacent spacer results in partial spacer sequence duplication upstream of the new spacer sequence after DNA gap repair. (B) Analysis of “other” sites of integration in Ins C24 repeat mutation strain from Figure 8. Off-target second-site integration events occur predominately at site 44 and 45 within the spacer sequence resulting in partial spacer duplication upstream of the unique spacer of the expanded array.
